# Supplementary material
Source: PubMed Central journal article supplement (PMC3567679)

**Supplementary Table 1. Primers used in this study**

| #  | Primer name                 | Sequence (5'-3')                        |
|----|-----------------------------|-----------------------------------------|
| 1  | ep11amdSProm_Fw             | TATCGATACCGTCGACGCTGCTAGCAAGAAGAACT     |
| 2  | ep11amdSProm_Rv             | TACTCAAGACGTCGACAAGCTGAGTAGTAGTGAAGCGAA |
| 3  | ep11amdSTerm_Fw             | CTCAACCATGGTACCGACCATTATGGAATTGCATCG    |
| 4  | ep11amdSTerm_Rv             | GGGCGAATTGGGTACCACAGTCGTCGATGTAAGT      |
| 5  | ep11 prom<br>upstream_check | ACATCCTACTCGTACATGCA                    |
| 6  | amdsRV                      | CCAGAGCTCGTTCATGTAAACAGC                |
| 7  | ep12HindIII_Fw*             | GTACAAGCTTGCTGGCTGTCAACTGCATGTC         |
| 8  | ep12SalI_Rv*                | GTACGTCGACGTATGAGAAGCGTCGAAGAGG         |
| 9  | ep12SpeI_Fw*                | GTACACTAGTCTCCCCAAAGAAATGTTTACC         |
| 10 | ep12SpeI_Rv*                | GTACACTAGTCTTTGCGGCCGTTTCTC             |
| 11 | ep12 trafo-check_Fw         | GCAGCAGTGTGTCTCAGTTGA                   |
| 12 | hphSG_Rv                    | GCCGTCAACCAAGCTCT                       |
| 13 | ep12 trafo-check_Fw         | GCAGCAGTGTGTCTCAGTTGA                   |
| 14 | ep12 trafo check_Rv         | TGGGTCACATACATCATTAGC                   |

\* Enzyme restriction sites in primer sequences are indicated in italics

Suppl. Fig. 1. Time-course of the surface contact angle of an EPL1 solution (0.5 mg/mL) on different surfaces.

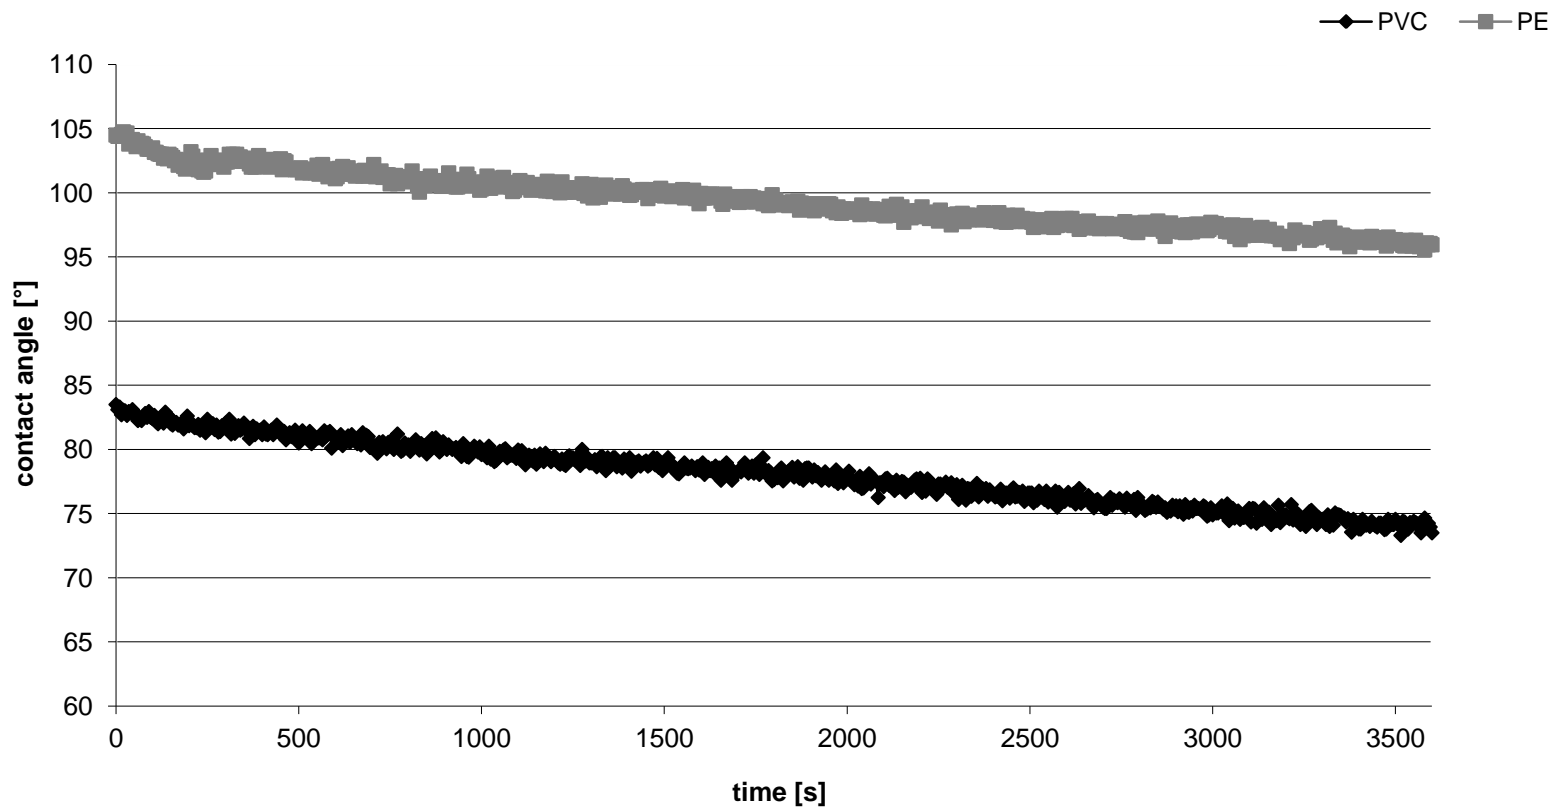

Suppl. Fig. 2. Alignment of EPL1 homologues from various filamentous fungi.

```

                *           20           *           40           *           60
Trichoderma_atroviride : VSYDTGYDDASRSLTVVSCSDGANGLITRYHWTQTQCOIPRFPYIGGQAVAGWNSPSCGTCWKLT : 65
Trichoderma_asperellum : VSYDTGYDDASRSLTVVSCSDGTNGLITRYHWTQTQCOIPRFPYIGGQAVAGWNSPNCGTCWKLT : 65
Trichoderma_harzianum : VSYDTGYDDASRSLTAVSCSDGTNGLITRYHWTQTQCOIPRFPYIGGQAVAGWNSPNCGTCWKLT : 65
Trichoderma_reesei : VSYDTGYDDGSRSLTAVSCSDGPNGLITRYHWTQTQCOIPKFPYIGGAAAVAGWNSAACGTCWKLS : 65
Trichoderma_virens : VSYDTGYDNGSRSLNDVSCSDGPNGLITRYHWTSTQCOIPRFPYIGGAAAVAGWNSASCGTCWKLQ : 65
Trichoderma_viride : VSYDTGYDDGSRSLNVVSCSDGPNGLITRYHWTSTQCOIPRFPYIGGQAVAGWNSASCGTCWKLS : 65
Aspergillus_fumigatus : VSYDPRYDNGATSMNDVSCSNGVNGLVTK--WPTFGSVPGFARIGGAPTIPGWNSPNCCKKQKQLQ : 63
Aspergillus_niger : VSYDTAYDVSASLTVVSCSDGANGLITKNG--YSNFESLPGFPIKIGGAPTIAAGWNSPNCCKKCALT : 64
Beauveria_bassiana : VSYDTGYDDGSRSLTKVACSDGDNGLITRYHWTQSQSOTIPRFPYIGGQAAIGWNSPACGSCWKVE : 65
Botryotinia_fuckeliana : VSYDTGYDDASRSLAVVSCSDGSNGLITKG--YTTQCSLKNFPIGGAQAVAGWNSPNCCKKCALT : 64
Chaetomium_thermophilum : VSYDTGYDDATRSLAAVACSDGTNGVMWYKYNKVKQCDVKNFPIGGSSEAIGWNSPNCGTCWAAAT : 65
Coccidioides_inimmitis : LSYDTHYDDPSLPLSVTCSGDNGMLITKG--YNTACEIPNYPHVGGAFVTETWNSPNCCKKQKVT : 64
Coccidioides_posadasii : LSYDTHYDDPSLPLSVTCSGDNGMLITKG--YNTACEIPNYPHVGGAFVTETWNSPNCCKKQKVT : 64
Cochliobolus_lunatus : VSYDTGYDDASRSMNVVSCSDGANGLAARF--PTQCNLPSFPIRIGGYQGIAGWNSPQCGQCFSLT : 63
Colletotrichum_higginsianum : VSYDTGYDDGARSLTAVSCSDGANGLITRYGWTQNOQGVARFPYIGGQAVAGWNSPSCGTCWOLT : 65
Fusarium_oxysporum : VSYDPCYDGSASLTVVSCSDGANGLITRYGWTQNOQGVARFPYIGGQAVAGWNSPNCCKKCALT : 65
Gibberella_zeae : VSYDPCYDGEAGRAMTAVSCSDGTNGLITRYGWTQNOQGVARFPYIGGQAAIAGWNSPSCGTCWKLT : 65
Laccaria_bicolor : VSYDTKYDDGSTSLAVVACSDGTNGLITKG--HTTFESLPGFPIYIGGSFAIAGYNSPDCGTCWELT : 64
Leptosphaeria_maculans : VSYDTGYDDPNRSMGVVSCSDGPNGLMHRF--PTQCAIPNFRIRIGGLSGIA--WNSAQCGSCHKIT : 62
Magnaporthe_oryzae : VSYDTGYDDGSRSLTAVSCSDGANGLITRYGWTQNOQGVARFPYIGGQAVAGWNSPQCGTCWOLT : 65
Metarhizium_anisopliae : VSWDSGYDRADRSLTEVSCSDGKTMMPKY--QKQCDLPNFPINIGGADAIAGWNSPNCCKKCALD : 63
Nectria_haematococca : VSYDPCYDQSRSLTAVVACSDGKNGLITRYGWTQNOQGVARFPYIGGQAAIAGWNSASCGTCWKLT : 65
Neurospora_crassa : VSYDTGYDDPNRSLTAVVSCSDGSNGLITKYHWNFQNOVKNFYIGGVEAVAGWNSPNCCTCWSVT : 65
Phaeosphaeria_nodorum : VSYDQGYDDGSRSLTAVSCSDGANGLITRYGWTQNOQGVARFPYIGGQAVAGWNSPQCGTCWELT : 65
Podospora_anserina : VSYDTGYDDPNRSLTAVVACSDGPNGLITRYGWTQNOQGVARFPYIGGQAVAGWNSPNCCTCWSAT : 65
Pyrenophora_tritici-repentis : VSYDTGYDDASRSLNVVSCSDGPNGLITRYGWTQNOQGVARFPYIGGQAVAGWNSPNCCTCWSAT : 65
Sclerotinia_sclerotiorum : VSYDTGYDDASRSLDVVSCSDGSNGLITKG--HSTQCSLKNFPIGGAQAVAGWNSPNCCKKCALD : 64
Serpula_lacrymans : VSYDTSYDNGAASLTVVACSDGVTGLTEG--YTTFSSLPDFYIGGAPAITGWDSPSCGTCWELN : 64
Sordaria_macrospora : VSYDTGYDDPNRSLTAVVSCSDGANGLITRYGWTQNOQGVARFPYIGGQAVAGWNSPNCCTCWSVT : 65
Taiwanofungus_camphoratus : VTYDPPFDNPNNSLSYVACSDGTNGLITKG--YTTLSLPDFYIGGAYAIAGWNSPSCGTCWELT : 64
Thielavia_terrestris : VSYDTGYDDPSRPLTAVVACSDGTNGLITRYGWTQNOQGVARFPYIGGQAVAGWNSPNCCTCWSAT : 65
Trametes_versicolor : VSYDQAYDNGSSSLTAVVACSDGANGLITRYGWTQNOQGVARFPYIGGQAVAGWNSPQCGTCWKLT : 64
Verticillium_dahliae : VSYDKGYDDGSRSLTAVVSCSDGANGLITRYGWTQNOQGVARFPYIGGQAVAGWNSPNCCTCWEELS : 65
Ceratocystis_platani : LSYDPIY--AADLSMGSVACNSGDHGLMAQY--PTLCEVWGEFNVGGIPDIAGWDSPPSCGTCWKVT : 62

```

```

                *           80           *           100          *           120
Trichoderma_atroviride : YS-----GKTIYVLAVDHSAAGFNIGLIDAMNALTNGNAVQYGRVDAT-ASQVAVSNCGL--- : 118
Trichoderma_asperellum : YS-----GKTIYVLAIDHTAAGFNIGLIDAMNALTNGNAVALGRVSAT-ASQVAVSNCGL--- : 118
Trichoderma_harzianum : YS-----GKTIYVLAIDHAGAGFNIGLIDAMNALTNGNAVALGRVSAT-ASQVAVSNCGL--- : 118
Trichoderma_reesei : YS-----GHTIYVLAIDHAAAGFNIALDAMNALTGGQAVQLGRVDAT-ATQVAVSNCGL--- : 118
Trichoderma_virens : YS-----GHTIYVLAVDHAAAGFNIALDAMNALTGGQAVQLGRVSAT-ATQVPVKNCGL--- : 118
Trichoderma_viride : YS-----GHTIYVLAVDHAAAGFNIALDAMNALTGGQAVQLGRVTAT-ASQVAVKNCGL--- : 118
Aspergillus_fumigatus : YE-----QNTIYVTAIDAAPGFNIATSAAMDQLTNGMAVELGRVQAT-YEEADPSHCASG-- : 117
Aspergillus_niger : YN-----GQTVNIIAIDHSNSGFNIALEAMNLTNNQAVQLGRVQAT-YEEADPSHCASG-- : 116
Beauveria_bassiana : YK-----GRSVTVLAIDRAVSGLNIGLHALNDLTGGRGVEVGRIEAQ-VTQVDVGGQCGL--- : 118
Botryotinia_fuckeliana : YG-----GRSINVLAIDHAGAGFNIGLIDAMNALTGGQAAALGRIDAS-YAQQVDSKACGL--- : 117
Chaetomium_thermophilum : YN-----GRTIHLAIDHAAAGLNIGLIDAMNALTNNKAVELGRVDAH-YVQVPLSNCGL--- : 118
Coccidioides_inimmitis : YN-----AKTIFLTAIDHSNSGFNIAKKSMDVLTNGRAEELGRIKVT-YEEVASSLCGLK-- : 118
Coccidioides_posadasii : YN-----AKTIFLTAIDHSNSGFNIAKKSMDVLTNGRAEELGRIKVT-YEEVASSLCGLK-- : 118
Cochliobolus_lunatus : YN-----GNSIYVLAIDHAGAGFNIAQAAMNQLTNGQAAALGRIDAQ-YAQQVDRSNCGL--- : 116
Colletotrichum_higginsianum : YN-----GKSINVLAVDHAGSGFNIALGALNDLTNGQAVQLGRVQAT-ATQVGLNACGL--- : 118
Fusarium_oxysporum : YK-----GKSINVLAIDHTAAGFNISPAAMNALTNNQAVKLGVDAT-ATQVAVSNCGL--- : 119
Gibberella_zeae : YK-----GKSINVLAIDHTAAGFNISPAAMNALTNNQAVQLGRVDAT-ATQVAVSNCGLKK-- : 120
Laccaria_bicolor : YNNGAGVVKSINVLAIDVAKPFGNIGLVAMNLTGGQAVHLEGRVQAT-VKQVNASICGLK-- : 123
Leptosphaeria_maculans : YN-----GKSIFVVAIDSSSTGFNIGLITAMNLTNNQAVQLGRVQAT-VTQVAVSNCGL--- : 115
Magnaporthe_oryzae : YN-----GKSINVLAIDHAGAGFNISPAAMNALTNNQAVKLGVDAT-ATQVAVSNCGL--- : 117
Metarhizium_anisopliae : YD-----GMSIKVLAIDHAGSGFNIGQAMNALTNGRAVEFGQVDAT-ATRLTPQDCGL--- : 116
Nectria_haematococca : YK-----GKSINVLAIDHTAAGFNIALTAMNALTNNQAVKLGVDAT-ATQVAVSNCGL--- : 119
Neurospora_crassa : YN-----GKTINILAIDHAGAVNLSKKAMNLTGGNAEQFGRVDAQ-VQVVALSACGL--- : 118
Phaeosphaeria_nodorum : YN-----GNTIYVLAVDHAGDGNIAKQAMQDQLTNGQAVQLGRVQAT-ATQVAVSNCGL--- : 118
Podospora_anserina : WN-----GNTIYVLAIDHTGSGLNIGLGRMDALTNGHGQELGRVDAV-VAQVPISRCGL--- : 118
Pyrenophora_tritici-repentis : YN-----GKTIYVLAIDHTAAGFNIAKAGAMDELTTNNQAVSLGRIDAQ-YSQVAVSNCGL--- : 118
Sclerotinia_sclerotiorum : YA-----GRSINVLAIDHAAAGFNIGQAMNALTGGQAVQLGRVQAT-ATQVAVSNCGL--- : 117
Serpula_lacrymans : YSAGS--INETYVLAIDVGGDGFNIGLITAMNLTNNQAVQLGRVQAT-ATQVAVSNCGL--- : 121
Sordaria_macrospora : YK-----GKTINILAIDHAGAGINMSKKAMNLTGGNAEQFGRVDAQ-VKQVVALKACGL--- : 118
Taiwanofungus_camphoratus : YN-----NVSINILGIDT--AAGFNIALTAMNLTNNQAVQLGRVQAT-ATQVAVSNCGL--- : 116
Thielavia_terrestris : YN-----GRTIHLAIDHAAAGLNIGLITAMNLTNGHAEELGRVDAH-VQVPLSTCGL--- : 118
Trametes_versicolor : FN-----GKSINVLAVDHTDAGFNIALGAMNLTNGQAVQLGRIDAQ-ATQVAVSNCGL--- : 117
Verticillium_dahliae : YN-----GRTINVLAIDHSANGFNIALDAMNALTGGQAVKLGVDAS-SKQVNSKCGL--- : 118
Ceratocystis_platani : IPN----GNSIFIRGVDSSRGGFNINVTAFATKLVG--STEAQGRVDNVNYVQVPLSNCGINGAN : 118

```

Suppl. Fig. 3. Microscopic analysis of hyphal growth and chlamydospore formation in *T. atroviride*. Arrows indicate examples for chlamydospores. Scale bars = 100  $\mu$ m.

*T. atroviride* WT

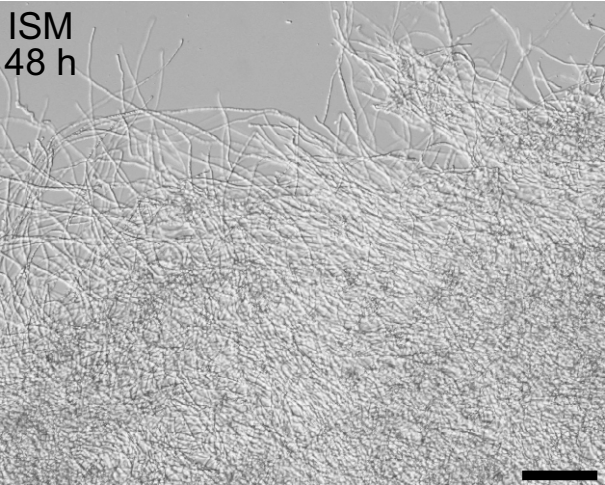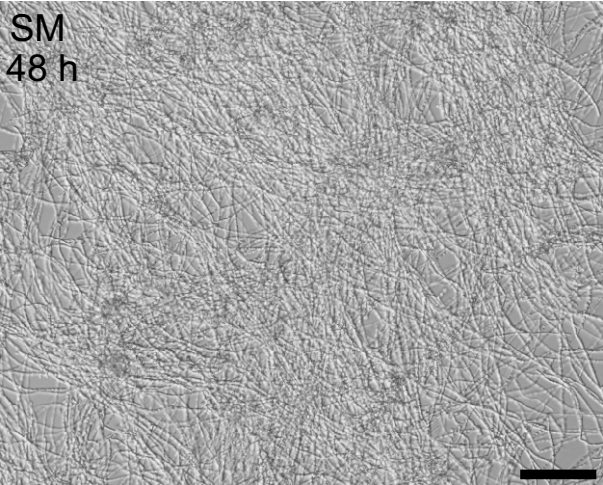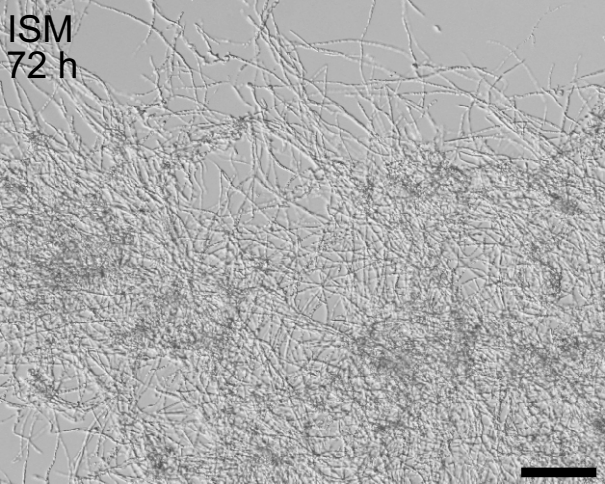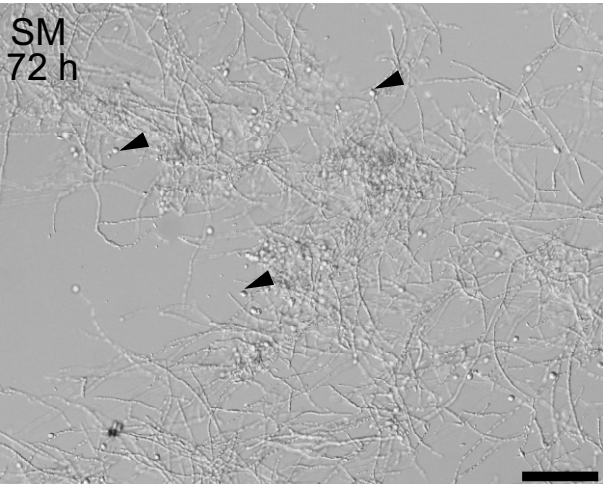

Suppl. Fig. 4. Genomic locus maps for the generation of (a)  $\Delta epl1$ , (b)  $\Delta epl2$  and (a + b)  $\Delta epl1\Delta epl2$  strains.

(a)

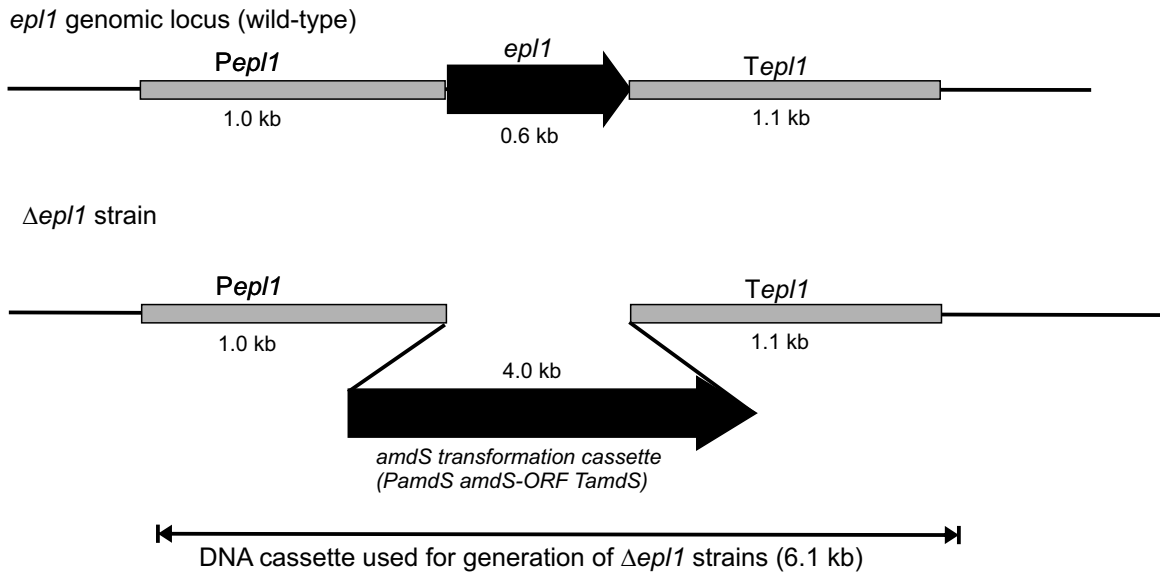

(b)

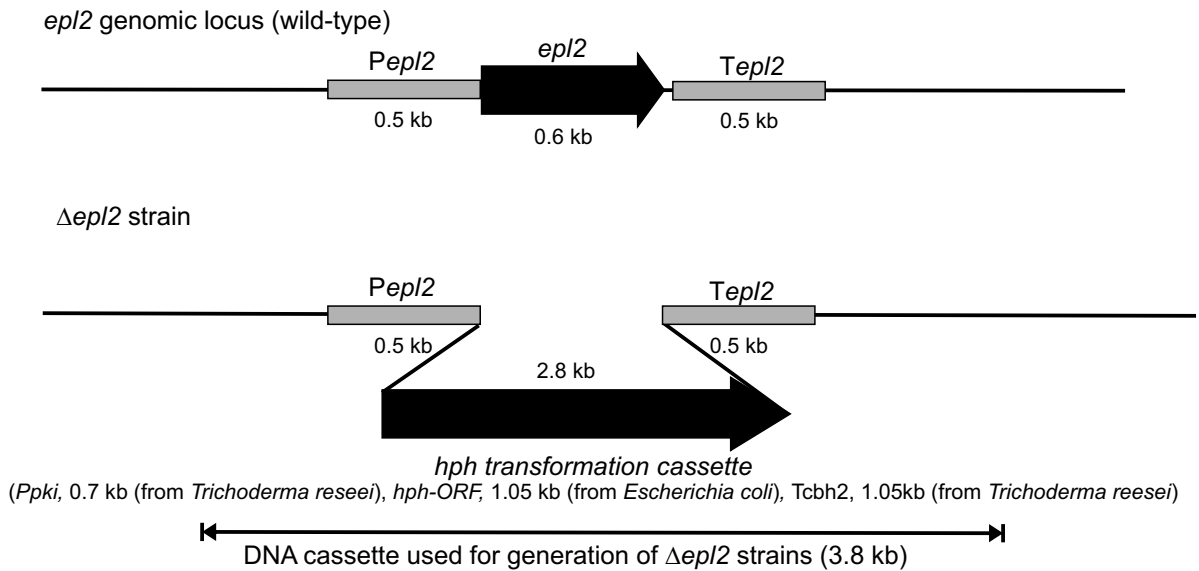

Suppl. Fig. 5. Identification and verification of *epl1* and *epl2* single and double knockout strains. (a) Identification of *epl1* knockout strains using the primers 5/6 (Suppl. Table 1), yielding a PCR product with the size of 4.4 kb. (b) After purification, *epl1* knockout strains were further verified for the absence of the wild-type gene using the primers 1/4, yielding a 2.6 kb band for the wild-type locus. (c) For the *epl2* knockout locus fungal transformants were verified by PCR with the primers 11/12, yielding a 2.5 kb band. (d) Absence of the *epl2* gene was further verified with the primers 13/14, yielding a 1.5 kb band for the *epl2* wild-type locus.

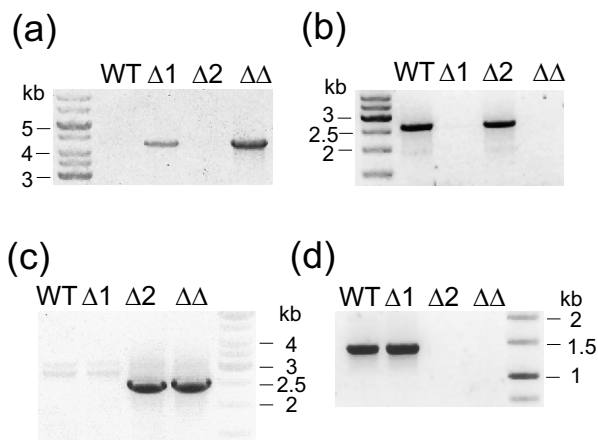



Suppl. Fig. 7 a-c. Microscopic analysis of hyphal growth and chlamydospore formation of (a)  $\Delta epl1$  and (b)  $\Delta epl2$  and (c) double knockout strains. Arrows indicate examples for chlamydospores. Scale bars = 100  $\mu\text{m}$ .

(a) *T. atroviride*  $\Delta epl1$

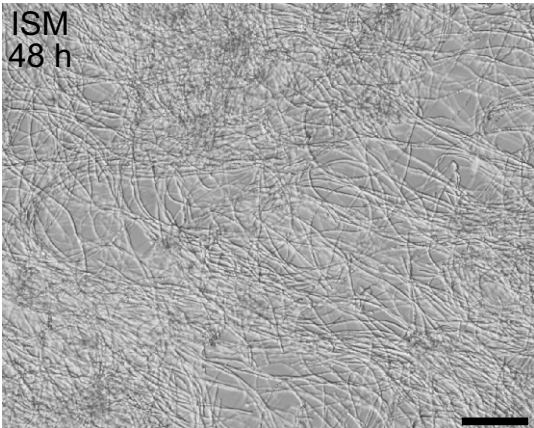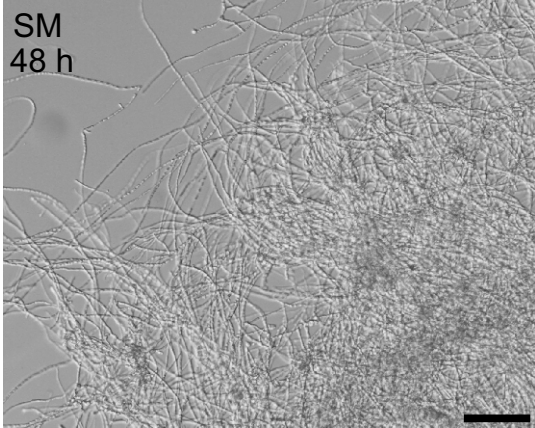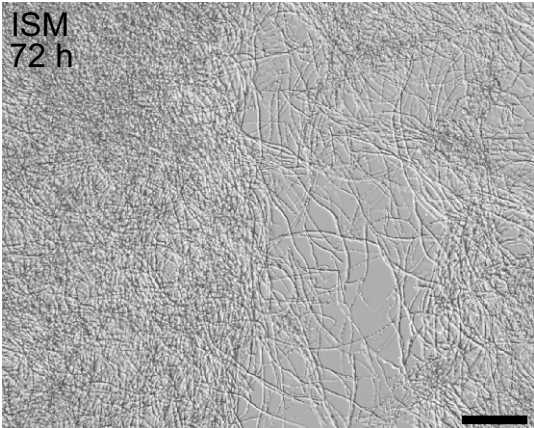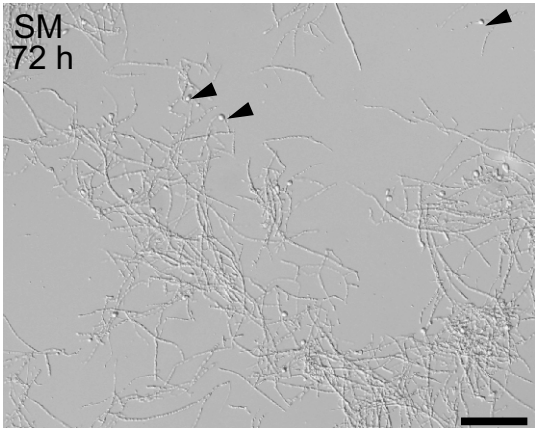

(b) *T. atroviride*  $\Delta epl2$

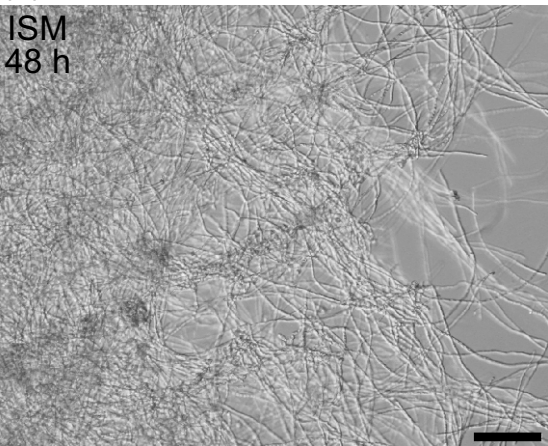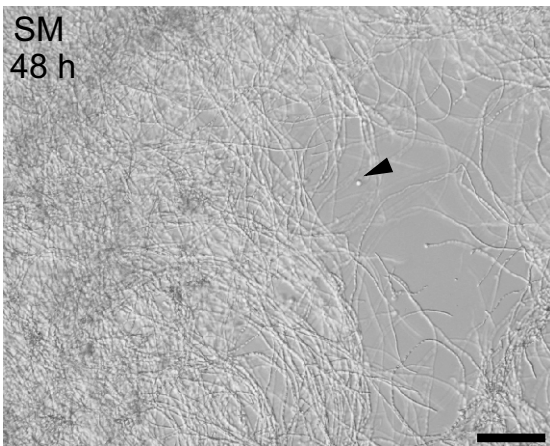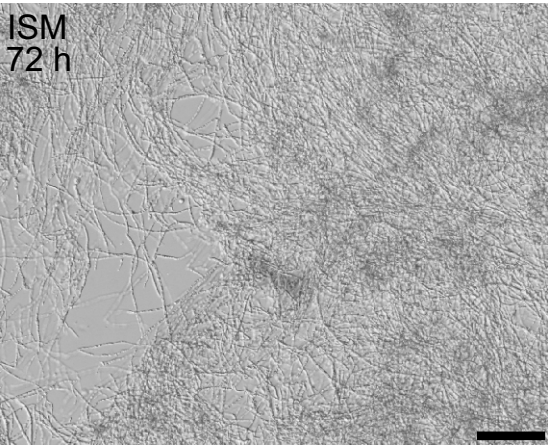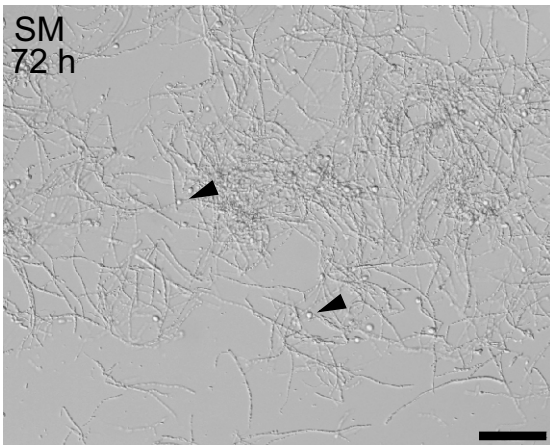



(c) *T. atroviride*  $\Delta epl1\Delta epl2$

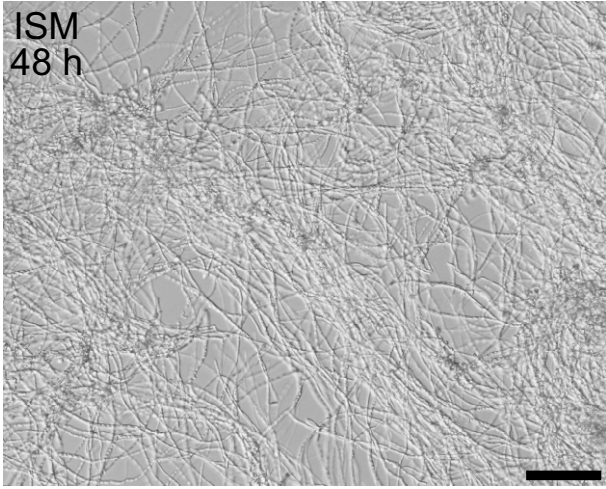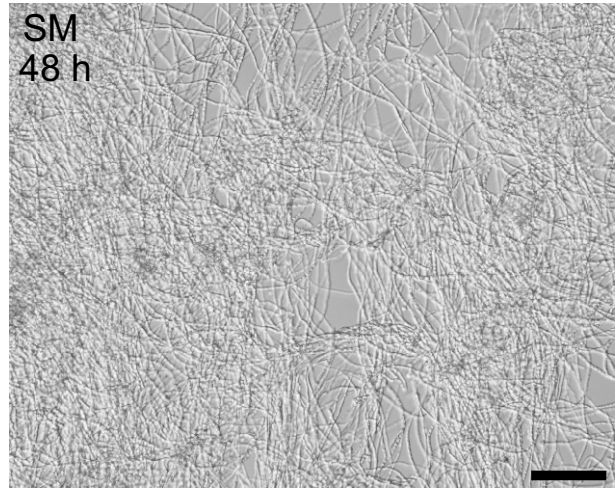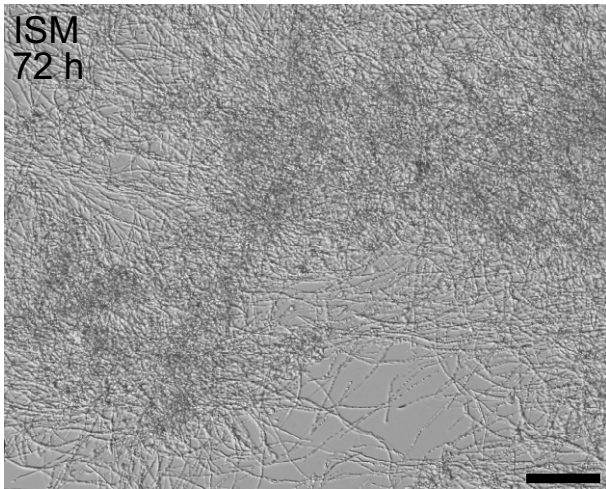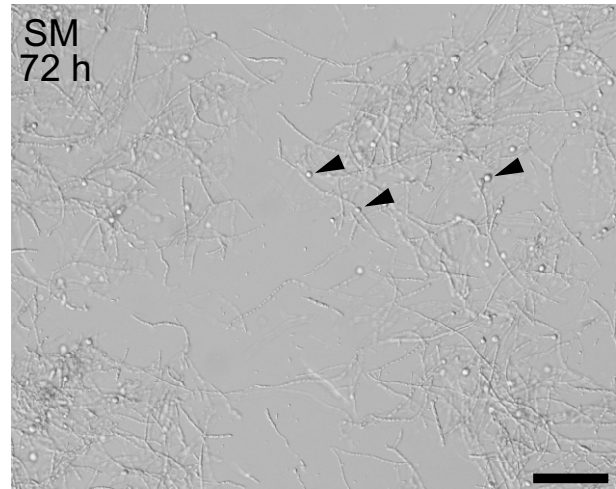

Supplement: supp_M112.427633_jbc.M112.427633-1.pdf [file supp_M112.427633_jbc.M112.427633-1.pdf]
